# Supplementary material
Source: Research Square preprint supplement (doi:10.21203/rs.3.rs-9993426/v1)
Supplement: Supplementary file 1 [file 400dcb7f59928500399f8a7d.docx]

**APA-Style Tables for DRL Cryptocurrency Statistical Arbitrage**

*Universe Labels and Robustness Tables*

**Table 1**

*Asset universes used in the empirical design.*

| **Universe label** | **No. of assets** | **Assets** | **Purpose** |
| --- | --- | --- | --- |
| Baseline 14-Asset Universe | 14 | BTC, ETH, BNB, XRP, ADA, SOL, DOT, BCH, LTC, AVAX, ALGO, AAVE, UNI, CAKE | Replication baseline matching the published 14-asset cryptocurrency universe. |
| Broad 20-Asset Universe | 20 | BTC, ETH, BNB, XRP, ADA, SOL, DOT, BCH, LTC, AVAX, ALGO, AAVE, UNI, CAKE, DOGE, LINK, TRX, XLM, ATOM, FIL | Broad-market extension used to test scalability and asset-set noise. |
| Payment-Coin 6-Asset Universe | 6 | BTC, BCH, LTC, DOGE, XRP, XLM | Payment-focused subset used to test whether economically related assets improve cointegration stability. |
| Layer-1 Platform 9-Asset Universe | 9 | ETH, BNB, ADA, SOL, DOT, AVAX, ALGO, TRX, ATOM | Blockchain-platform sector subset used to test sector-specific arbitrage performance. |

*Note.* Each universe uses USDT-denominated Binance spot pairs at a 30-minute frequency. The Baseline 14-Asset Universe provides the closest replication baseline; the other universes test universe size and economic similarity.

**Table 2**

*Main model results by asset universe using the seed-42 run.*

| **Universe** | **Strategy** | **Action** | **Return (%)** | **Sharpe** | **Calmar** | **Max DD (%)** | **Vol. (%)** | **Turnover** |
| --- | --- | --- | --- | --- | --- | --- | --- | --- |
| Baseline 14 | DQN | binary | 30.24 | 2.68 | 7.36 | -9.56 | 26.26 | 148.0 |
| Baseline 14 | DQN | granular | 8.69 | 1.16 | 1.90 | -12.16 | 19.81 | 413.0 |
| Baseline 14 | PPO | binary | -30.97 | -3.73 | -2.20 | -41.30 | 24.37 | 1242.0 |
| Baseline 14 | PPO | granular | -3.06 | -0.32 | -0.38 | -15.97 | 18.98 | 721.5 |
| Baseline 14 | A2C | binary | -38.30 | -4.32 | -3.00 | -39.49 | 27.42 | 1228.0 |
| Baseline 14 | A2C | granular | -28.50 | -5.53 | -2.84 | -29.54 | 15.16 | 903.0 |
| Baseline 14 | COIN benchmark | benchmark | 0.97 | 0.22 | 0.36 | -16.89 | 26.80 | 576.0 |
| Broad 20 | DQN | binary | -12.97 | -1.01 | -1.18 | -25.91 | 30.29 | 148.0 |
| Broad 20 | DQN | granular | -5.82 | -0.92 | -1.06 | -13.31 | 15.20 | 72.0 |
| Broad 20 | PPO | binary | -45.00 | -5.57 | -3.22 | -45.93 | 26.50 | 1468.0 |
| Broad 20 | PPO | granular | -9.48 | -1.28 | -1.57 | -15.01 | 18.42 | 872.5 |
| Broad 20 | A2C | binary | -21.10 | -2.09 | -1.75 | -32.32 | 27.03 | 1264.0 |
| Broad 20 | A2C | granular | -25.54 | -3.56 | -2.75 | -26.37 | 20.39 | 1023.0 |
| Broad 20 | COIN benchmark | benchmark | 3.25 | 0.45 | 0.76 | -14.73 | 25.24 | 548.0 |
| Payment-Coin 6 | DQN | binary | 32.26 | 1.72 | 3.89 | -21.05 | 47.49 | 206.0 |
| Payment-Coin 6 | DQN | granular | 24.59 | 1.80 | 3.77 | -16.26 | 34.03 | 401.5 |
| Payment-Coin 6 | PPO | binary | -39.91 | -2.57 | -2.84 | -41.66 | 45.90 | 1622.0 |
| Payment-Coin 6 | PPO | granular | -5.83 | -0.42 | -0.72 | -16.14 | 27.24 | 1630.5 |
| Payment-Coin 6 | A2C | binary | -28.12 | -1.65 | -2.12 | -34.83 | 44.78 | 1282.0 |
| Payment-Coin 6 | A2C | granular | -13.01 | -1.09 | -1.50 | -20.84 | 28.69 | 936.5 |
| Payment-Coin 6 | COIN benchmark | benchmark | -12.26 | -0.51 | -0.63 | -36.70 | 44.92 | 484.0 |
| Layer-1 Platform 9 | DQN | binary | -23.29 | -1.67 | -2.07 | -29.18 | 36.10 | 212.0 |
| Layer-1 Platform 9 | DQN | granular | -8.66 | -1.15 | -1.64 | -12.91 | 18.52 | 95.5 |
| Layer-1 Platform 9 | PPO | binary | -13.44 | -0.93 | -1.06 | -29.16 | 33.40 | 1860.0 |
| Layer-1 Platform 9 | PPO | granular | -7.83 | -0.51 | -0.51 | -31.29 | 31.06 | 1304.5 |
| Layer-1 Platform 9 | A2C | binary | -46.76 | -4.30 | -3.10 | -49.43 | 35.55 | 1330.0 |
| Layer-1 Platform 9 | A2C | granular | -18.57 | -1.58 | -1.57 | -30.24 | 30.14 | 1389.0 |
| Layer-1 Platform 9 | COIN benchmark | benchmark | -21.67 | -2.37 | -1.90 | -30.94 | 24.77 | 478.0 |

*Note.* The main table reports the seed-42 run for each universe and strategy. COIN is the cointegration benchmark. Max DD = maximum drawdown; Vol. = annualized volatility.

**Table 3**

*Binary versus granular action-space comparison*

| **Universe** | **Alg.** | **Ret. Binary (%)** | **Ret. Granular (%)** | **Delta Ret.** | **Sharpe Binary** | **Sharpe Granular** | **Delta Sharpe** | **DD Binary (%)** | **DD Granular (%)** | **Turn. Binary** | **Turn. Granular** |
| --- | --- | --- | --- | --- | --- | --- | --- | --- | --- | --- | --- |
| Baseline 14 | A2C | -38.30 | -28.50 | 9.79 | -4.32 | -5.53 | -1.21 | -39.49 | -29.54 | 1228.0 | 903.0 |
| Baseline 14 | DQN | 30.24 | 8.69 | -21.55 | 2.68 | 1.16 | -1.52 | -9.56 | -12.16 | 148.0 | 413.0 |
| Baseline 14 | PPO | -30.97 | -3.06 | 27.91 | -3.73 | -0.32 | 3.41 | -41.30 | -15.97 | 1242.0 | 721.5 |
| Broad 20 | A2C | -21.10 | -25.54 | -4.44 | -2.09 | -3.56 | -1.47 | -32.32 | -26.37 | 1264.0 | 1023.0 |
| Broad 20 | DQN | -12.97 | -5.82 | 7.15 | -1.01 | -0.92 | 0.09 | -25.91 | -13.31 | 148.0 | 72.0 |
| Broad 20 | PPO | -45.00 | -9.48 | 35.52 | -5.57 | -1.28 | 4.29 | -45.93 | -15.01 | 1468.0 | 872.5 |
| Payment-Coin 6 | A2C | -28.12 | -13.01 | 15.11 | -1.65 | -1.09 | 0.56 | -34.83 | -20.84 | 1282.0 | 936.5 |
| Payment-Coin 6 | DQN | 32.26 | 24.59 | -7.67 | 1.72 | 1.80 | 0.08 | -21.05 | -16.26 | 206.0 | 401.5 |
| Payment-Coin 6 | PPO | -39.91 | -5.83 | 34.08 | -2.57 | -0.42 | 2.15 | -41.66 | -16.14 | 1622.0 | 1630.5 |
| Layer-1 Platform 9 | A2C | -46.76 | -18.57 | 28.19 | -4.30 | -1.58 | 2.72 | -49.43 | -30.24 | 1330.0 | 1389.0 |
| Layer-1 Platform 9 | DQN | -23.29 | -8.66 | 14.63 | -1.67 | -1.15 | 0.53 | -29.18 | -12.91 | 212.0 | 95.5 |
| Layer-1 Platform 9 | PPO | -13.44 | -7.83 | 5.61 | -0.93 | -0.51 | 0.42 | -29.16 | -31.29 | 1860.0 | 1304.5 |

*Note.* Delta values are calculated as granular minus binary. Granular actions allow partial and flat positions; binary actions restrict the agent to full long-A/short-B or short-A/long-B exposure.

**Table 4**

*Robustness statistics across random seeds for key models.*

| **Universe** | **Alg.** | **Action** | **n** | **Seeds** | **Ret. M (%)** | **Ret. SD** | **Ret. Min** | **Ret. Max** | **Sharpe M** | **Sharpe SD** | **Sharpe Min** | **Sharpe Max** | **DD M (%)** | **DD SD** | **DD Min** | **DD Max** | **Turn. M** | **Turn. SD** |
| --- | --- | --- | --- | --- | --- | --- | --- | --- | --- | --- | --- | --- | --- | --- | --- | --- | --- | --- |
| Baseline 14 | DQN | binary | 3 | 42;101;202 | -10.92 | 33.05 | -30.02 | 27.24 | -1.42 | 3.35 | -3.36 | 2.45 | -24.15 | 12.63 | -31.47 | -9.56 | 164.0 | 28.0 |
| Payment-Coin 6 | DQN | binary | 3 | 42;101;202 | 16.50 | 45.05 | -35.51 | 43.04 | 0.67 | 2.47 | -2.18 | 2.11 | -28.61 | 15.37 | -46.35 | -19.61 | 197.3 | 35.2 |
| Payment-Coin 6 | DQN | granular | 3 | 42;101;202 | -28.22 | 5.94 | -33.42 | -21.74 | -2.70 | 0.61 | -3.39 | -2.23 | -35.28 | 12.87 | -48.69 | -23.02 | 882.3 | 173.0 |
| Layer-1 Platform 9 | PPO | granular | 3 | 42;101;202 | -14.57 | 15.37 | -27.62 | 2.38 | -3.17 | 3.24 | -6.04 | 0.34 | -26.42 | 3.74 | -28.92 | -22.12 | 1154.5 | 540.6 |

*Note.* Robustness statistics are computed across seeds 42, 101, and 202. Ret. = total return; DD = maximum drawdown; M = mean; SD = standard deviation; Turn. = total turnover.
